# Supplementary material
Source: Royal Society of Chemistry journal article supplement (doi:10.1039/d6tc01288d)
Supplement: d6tc01288d1.pdf [file d6tc01288d1.pdf]

Supplementary Material

**Effect of Ag<sup>+</sup> on the thermoelectric properties of Sm<sup>3+</sup> and Ti<sup>4+</sup> co-doped**

**KSr<sub>2</sub>Nb<sub>5</sub>O<sub>15</sub> ceramics: A combined first-principles and experimental study on synergistic optimization of thermal and electrical transport**

Qian Chen<sup>1,\*</sup>, Shuyao Cao<sup>2</sup>, Ziyao Wei<sup>3</sup>, Baoxing Zhai<sup>1</sup>, Jie Xu<sup>3</sup>, Feng Gao<sup>3</sup>

*1. Institute of Semiconductors, Henan Academy of Sciences, Zhengzhou, Henan 450046, China*

*2. School of Physics and Electronic Information, Yan'an University, Yan'an, 716000, China*

*3. State Key Laboratory of Solidification Processing, MIIT Key Laboratory of Radiation Detection Materials and Devices, School of Materials Science and Engineering, Northwestern Polytechnical University, Xi'an 710072, China*

\*Corresponding authors.

Email: chenqian910601@sina.com

## Figures List

Fig. S1 Bandstructure for Ag<sup>+</sup>-doped KSNST: (a) KSNST-Ag1 and (b) KSNST-Ag2

Fig. S2 Chemical potential dependence of (a)  $S$ , (b)  $\sigma/\tau$ , (c)  $S^2\sigma/\tau$ , (d)  $\kappa_e/\tau$  and (e)  $ZT$  of KSNST-Ag1

Fig. S3 Chemical potential dependence of (a)  $S$ , (b)  $\sigma/\tau$ , (c)  $S^2\sigma/\tau$ , (d)  $\kappa_e/\tau$  and (e)  $ZT$  of KSNST-Ag2

Fig. S4 (a)  $S$  and (b)  $\sigma$  of Ag<sup>+</sup>-doped KSNST

Fig. S5 (a)  $C_p$  and (b)  $\lambda$  of Ag<sup>+</sup>-doped KSNST ceramics

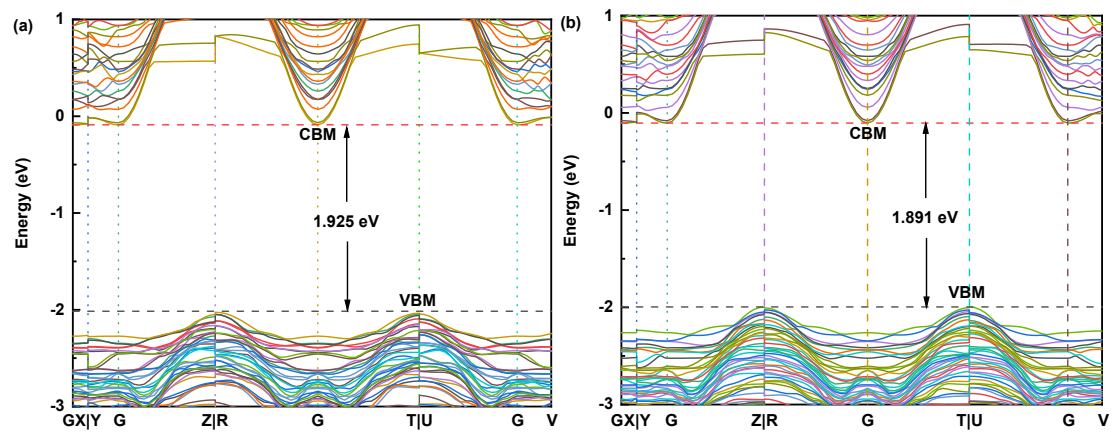

Fig. S1 Bandstructure for Ag<sup>+</sup>-doped KSNST: (a) KSNST-Ag1 and (b) KSNST-Ag2

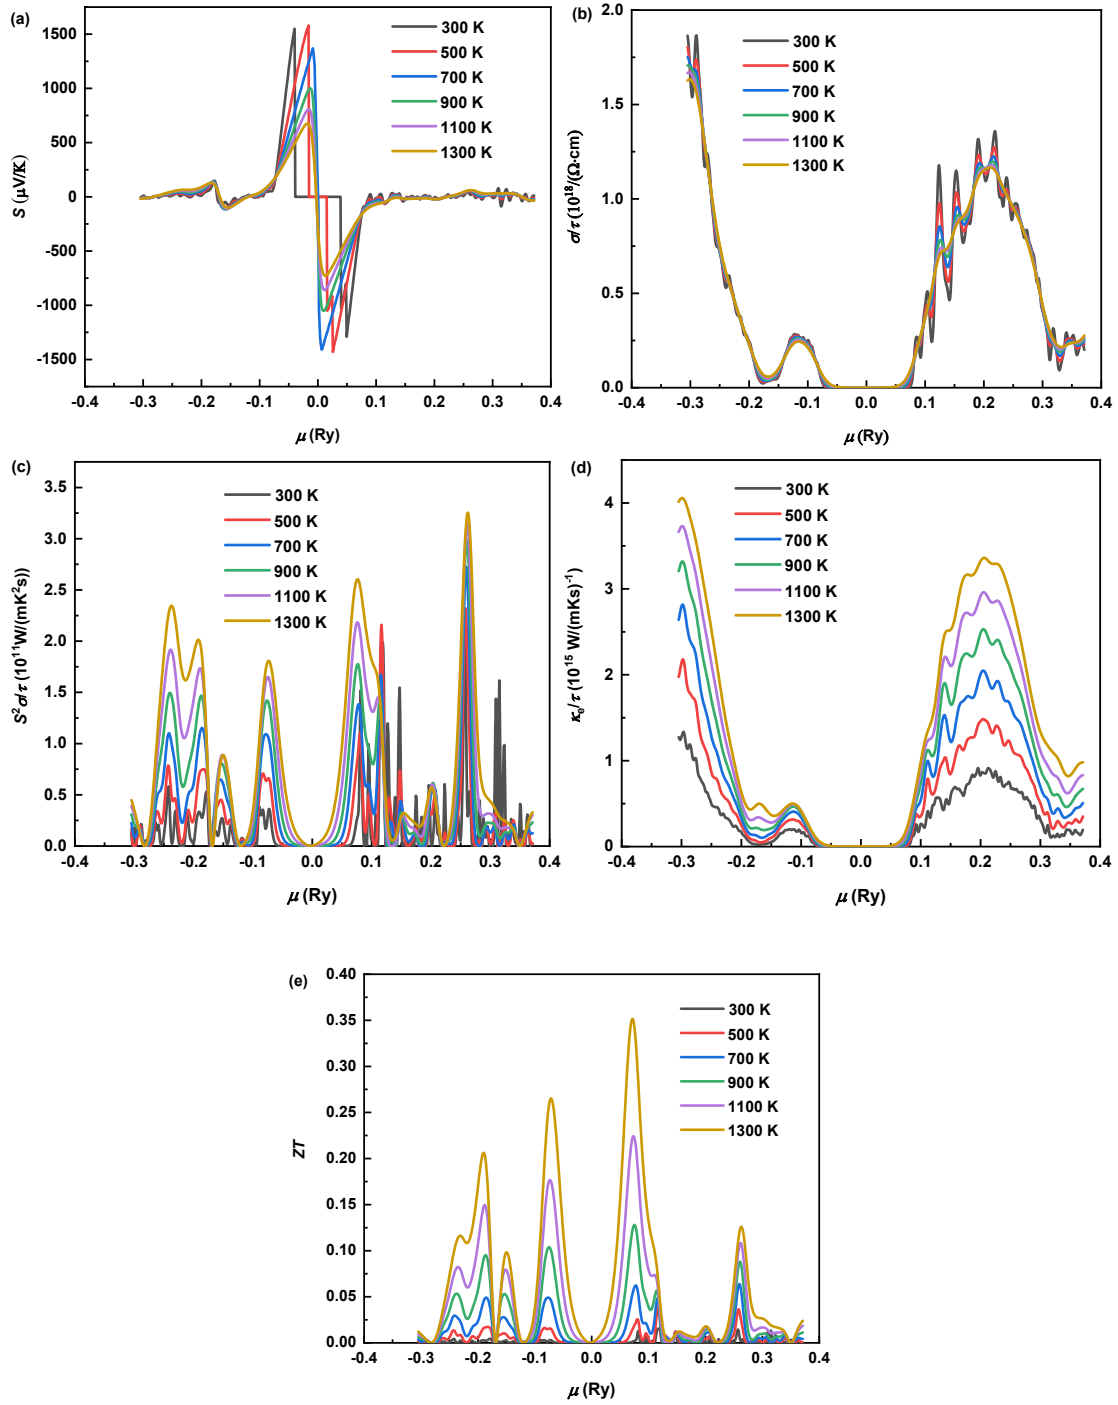

Fig. S2 Chemical potential dependence of (a)  $S$ , (b)  $\sigma/\tau$ , (c)  $S^2\sigma/\tau$ , (d)  $\kappa_e/\tau$  and (e)  $ZT$  of KSNST-Ag1

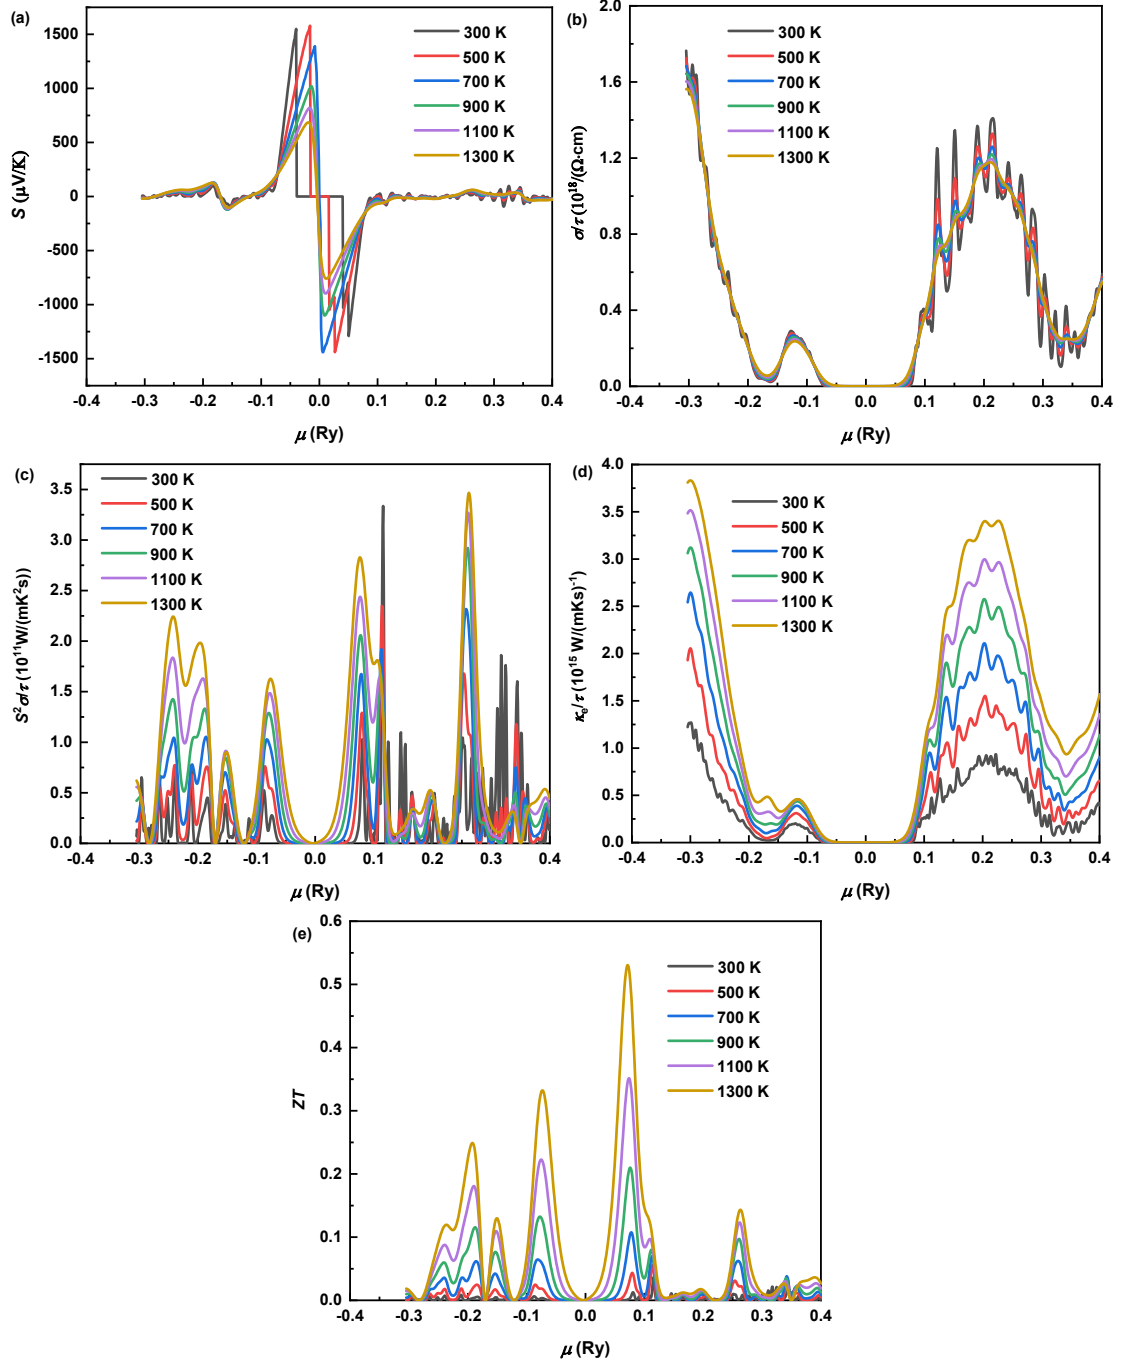

Fig. S3 Chemical potential dependence of (a)  $S$ , (b)  $\sigma/\tau$ , (c)  $S^2\sigma/\tau$ , (d)  $\kappa_c/\tau$  and (e)  $ZT$  of KSNST-Ag<sub>2</sub>

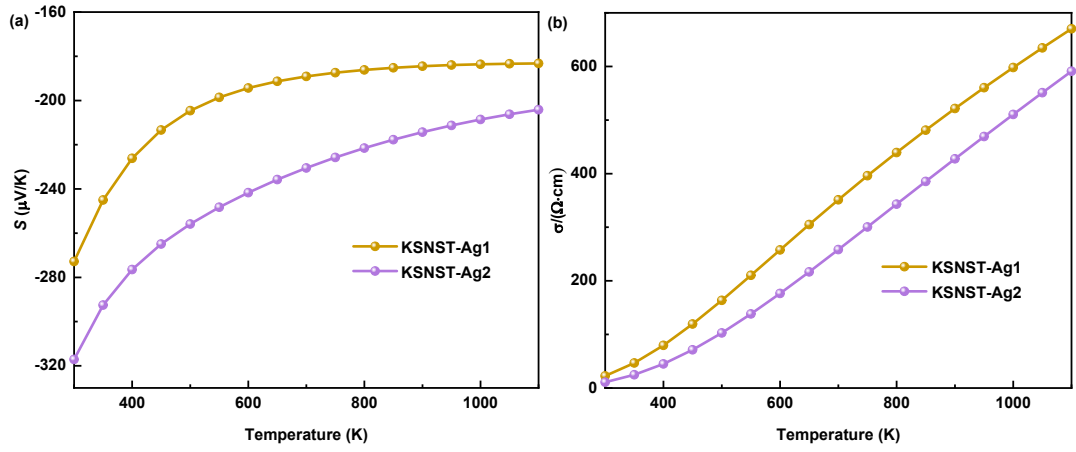

Fig. S4 (a)  $S$  and (b)  $\sigma$  of Ag<sup>+</sup>-doped KSNST

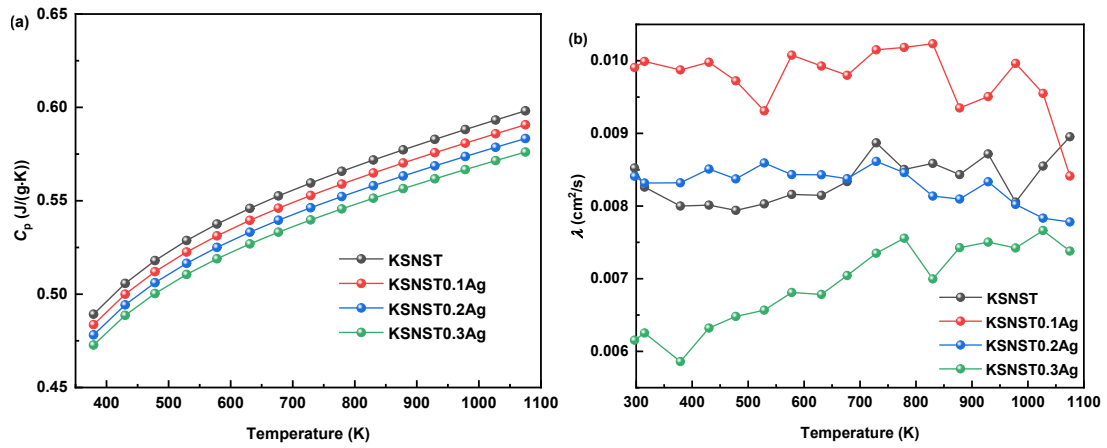

Fig. S5 (a)  $C_p$  and (b)  $\lambda$  of Ag<sup>+</sup>-doped KSNST ceramics

## Tables List

Table S1 Elastic constant, elastic modulus of Ag<sup>+</sup>-doped KSNST

Table S1 Elastic constant, elastic modulus of Ag<sup>+</sup>-doped KSNST

|           | $C_{11}$ | $C_{12}$ | $C_{44}$ | $B_{VRH}$ | $G_{VRH}$ | $E_{VRH}$ | $\sigma$ |
|-----------|----------|----------|----------|-----------|-----------|-----------|----------|
|           | (GPa)    | (GPa)    | (GPa)    | (GPa)     | (GPa)     | (GPa)     |          |
| KSNST-Ag1 | 195.962  | 184.195  | 60.819   | 104.829   | 75.986    | 183.597   | 0.208    |
| KSNST-Ag2 | 192.381  | 184.518  | 60.639   | 106.38    | 75.960    | 183.045   | 0.216    |
